# Supplementary material
Source: PubMed Central journal article supplement (PMC7101062)

Figure 1f

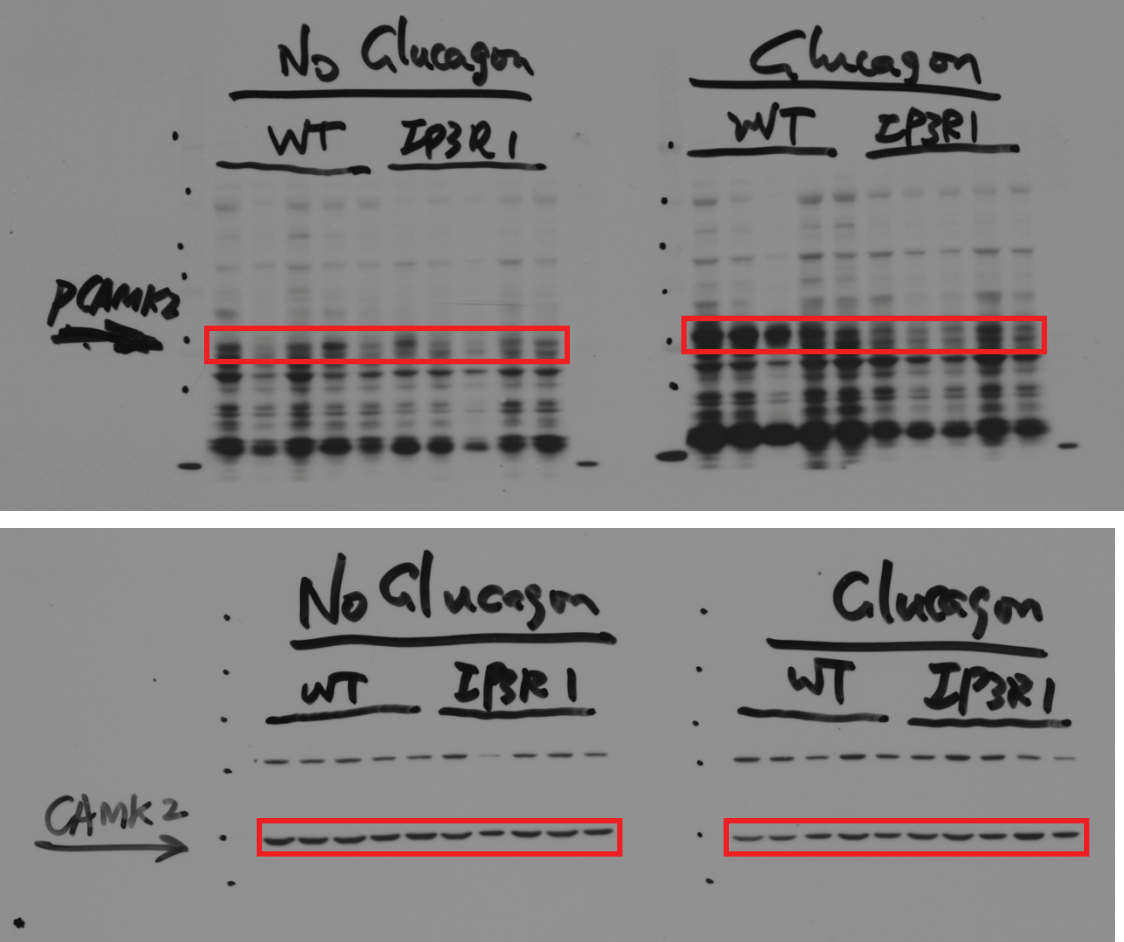

Extended Data Figure 1b

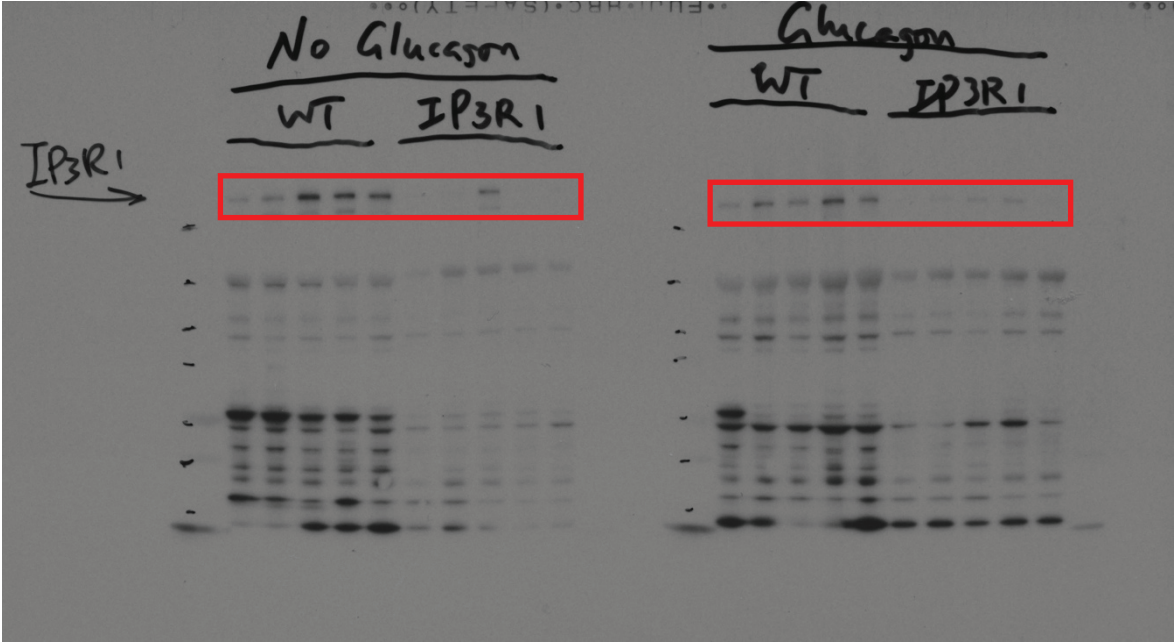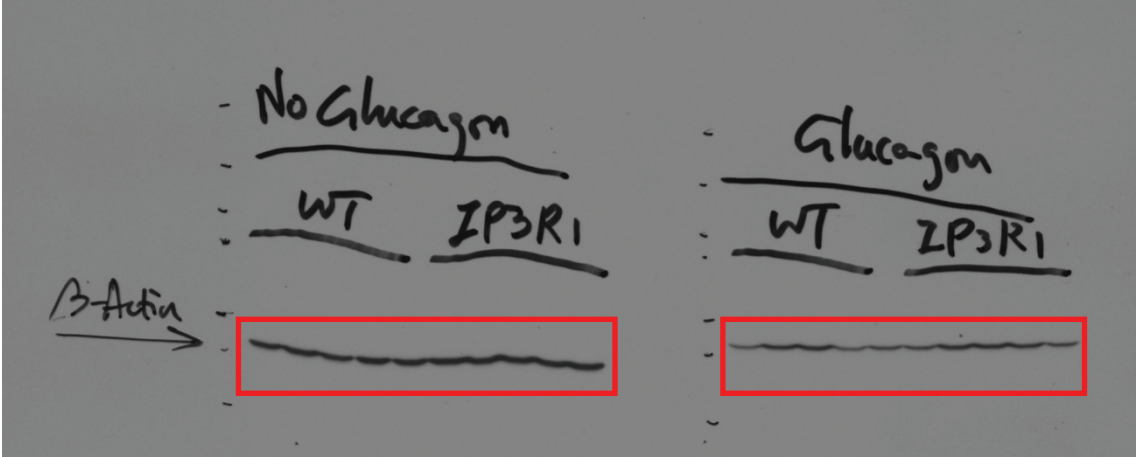

Extended Data Figure 1c

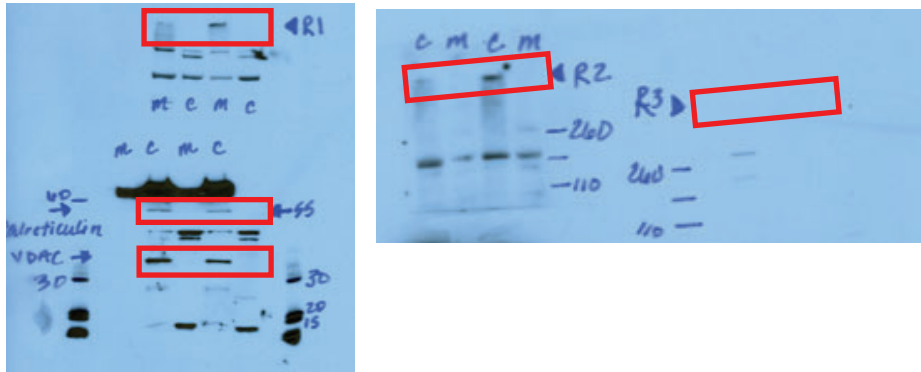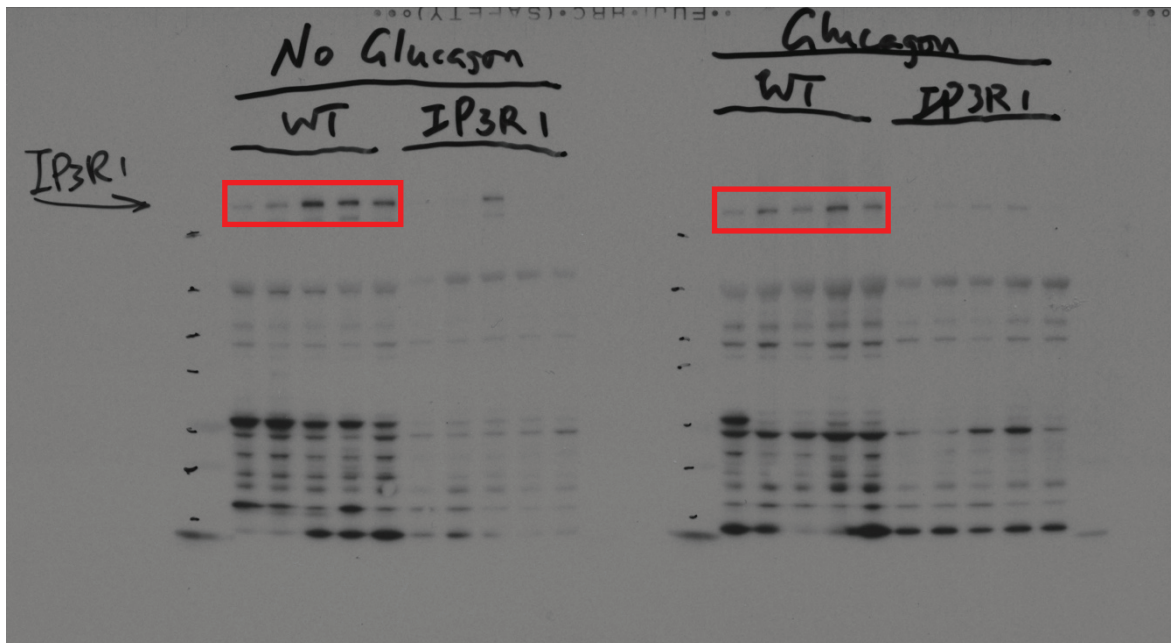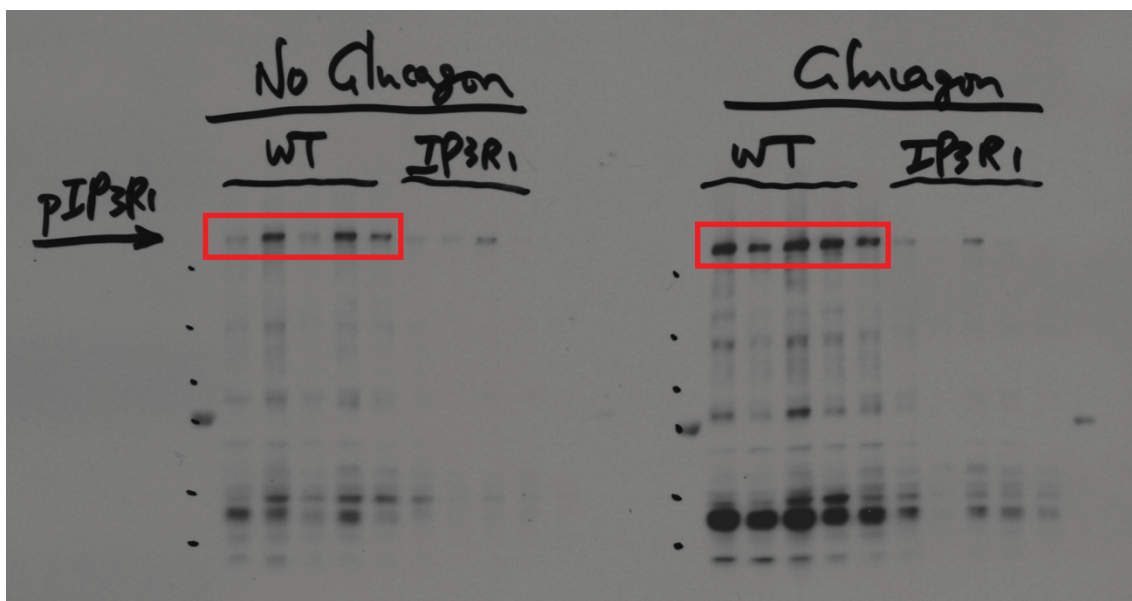



**Extended Data Figure 1d**

**4-12% gradient gel, optimized for hepatocyte controls**

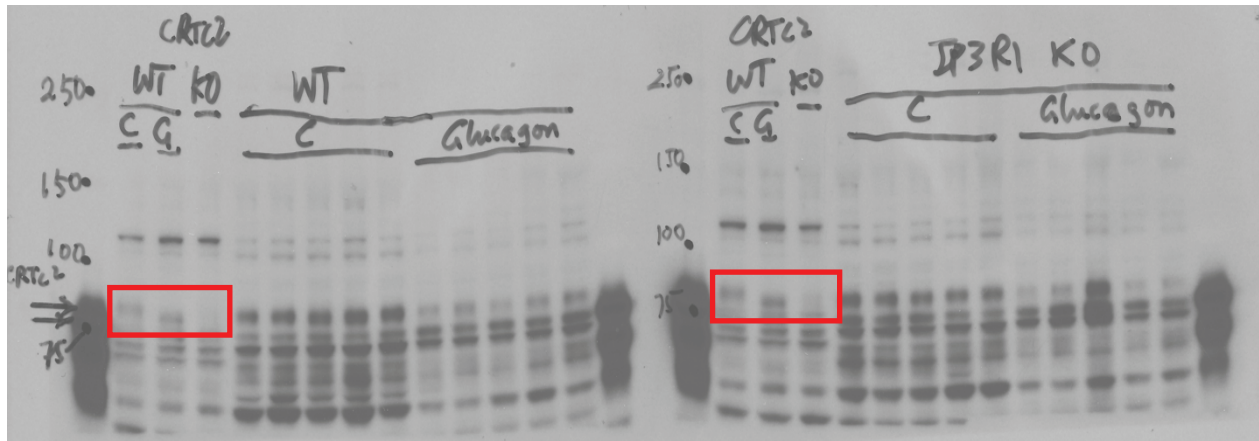

**4-12% gradient gel, stripped and reprobbed for HSP90 (loading control)**

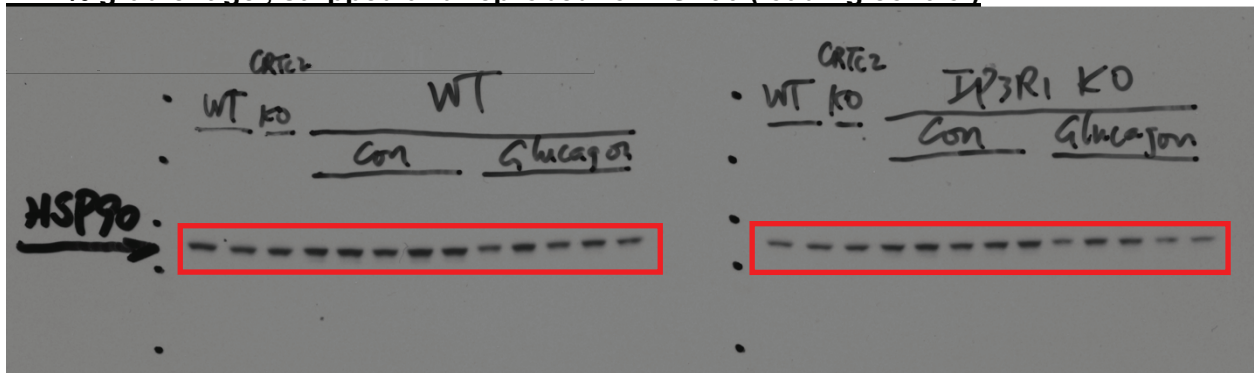

**8% gel, optimized for *in vivo* liver samples**

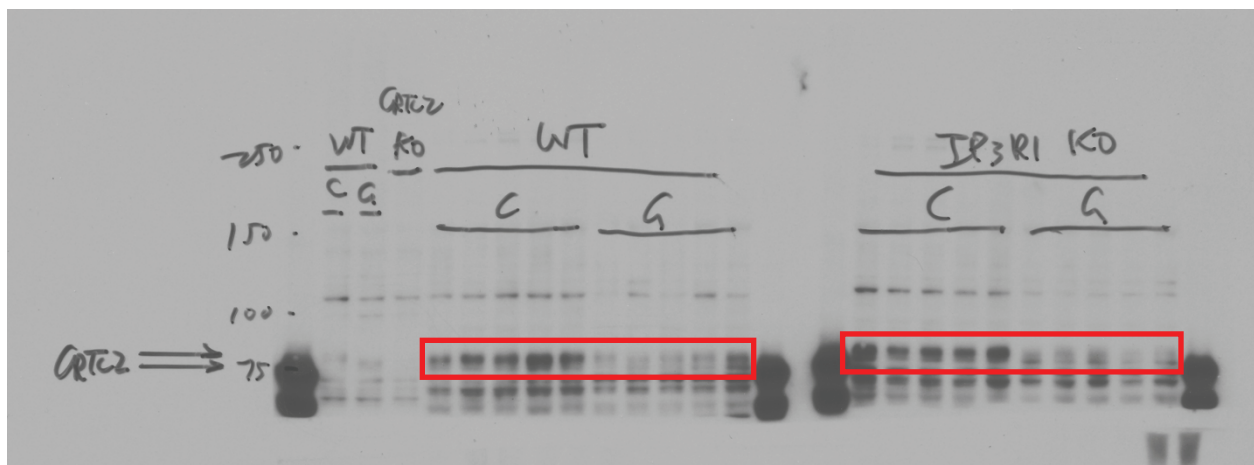



The 8% gel above, stripped and reprobed for HSP90 (loading control)

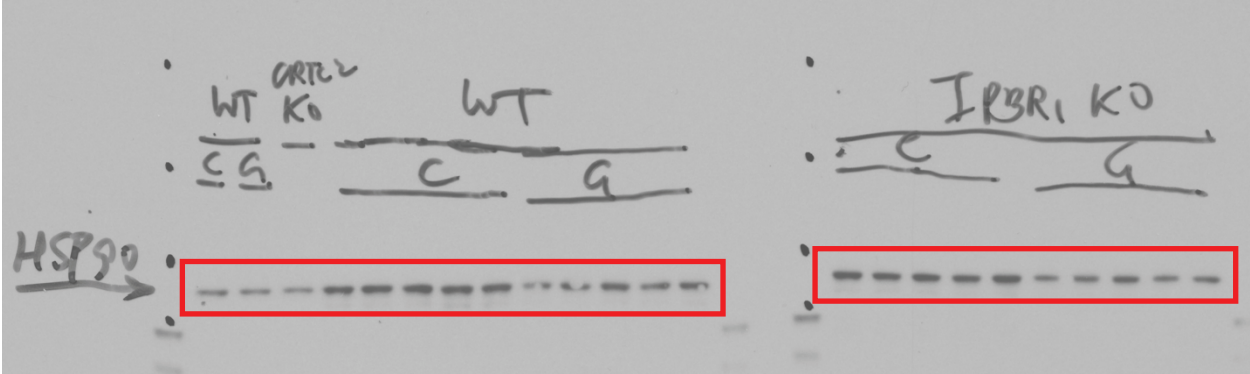

Extended Data Figure 1e

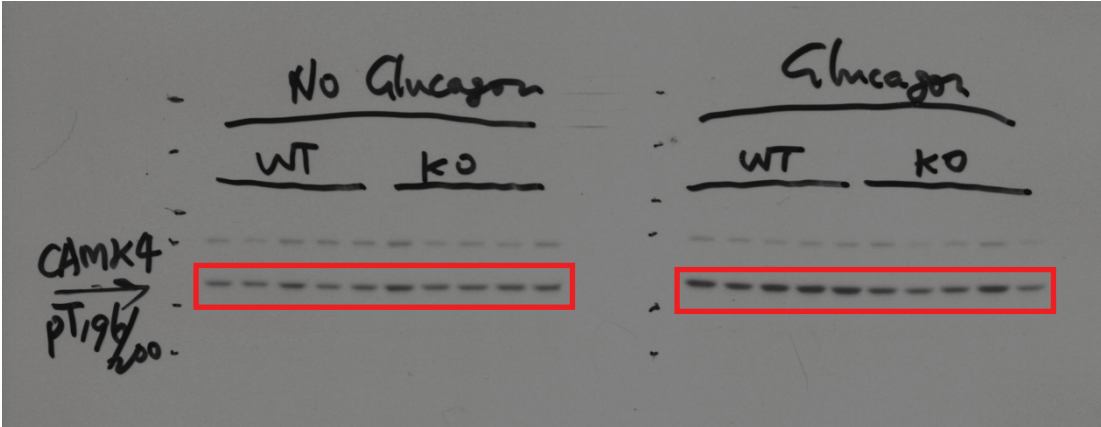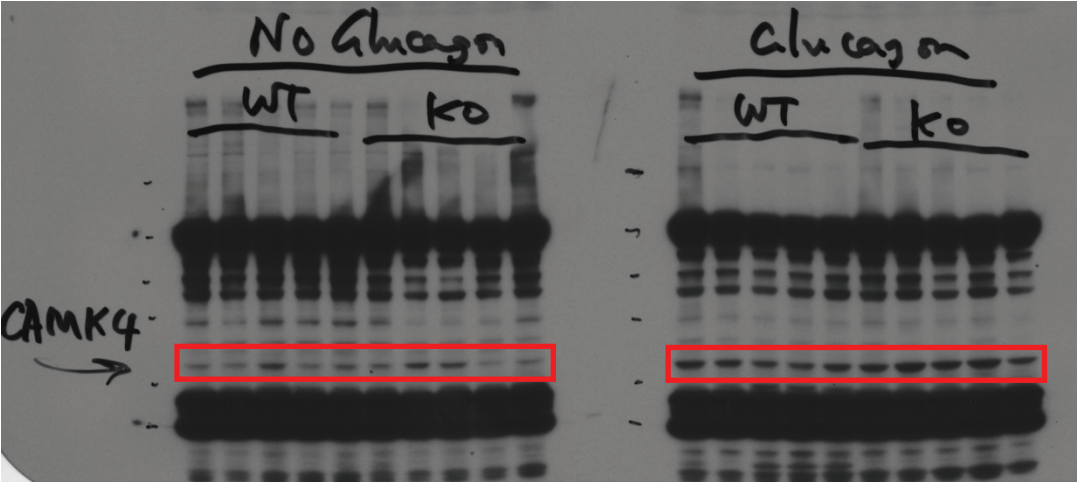

Extended Data Figure 3d

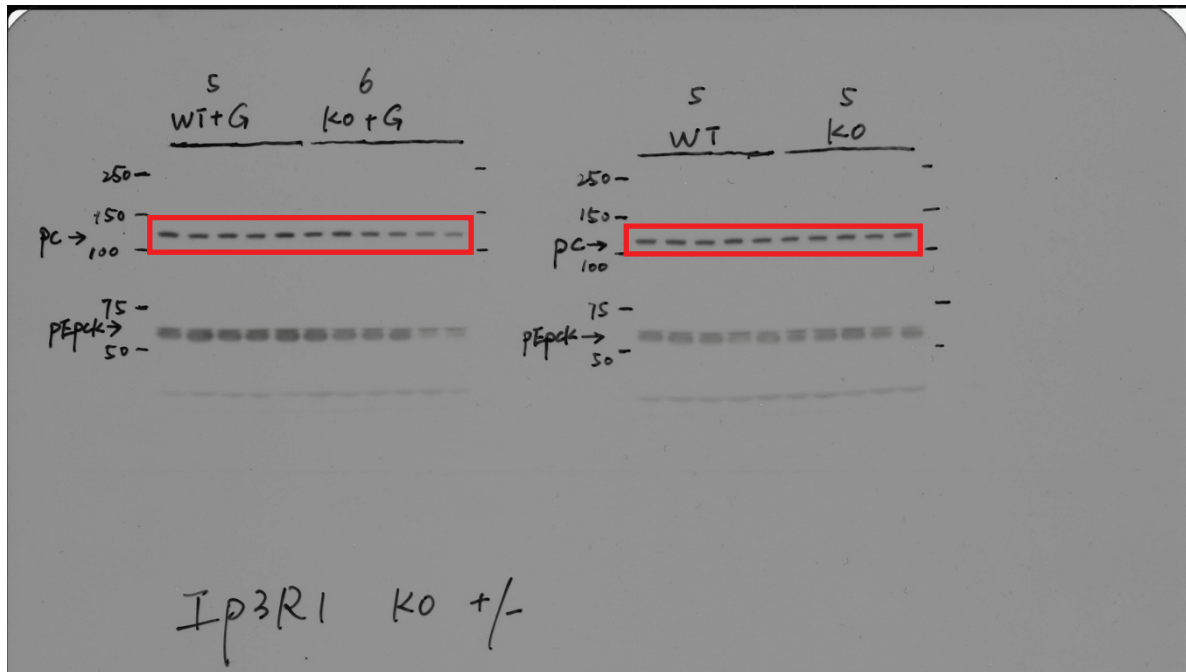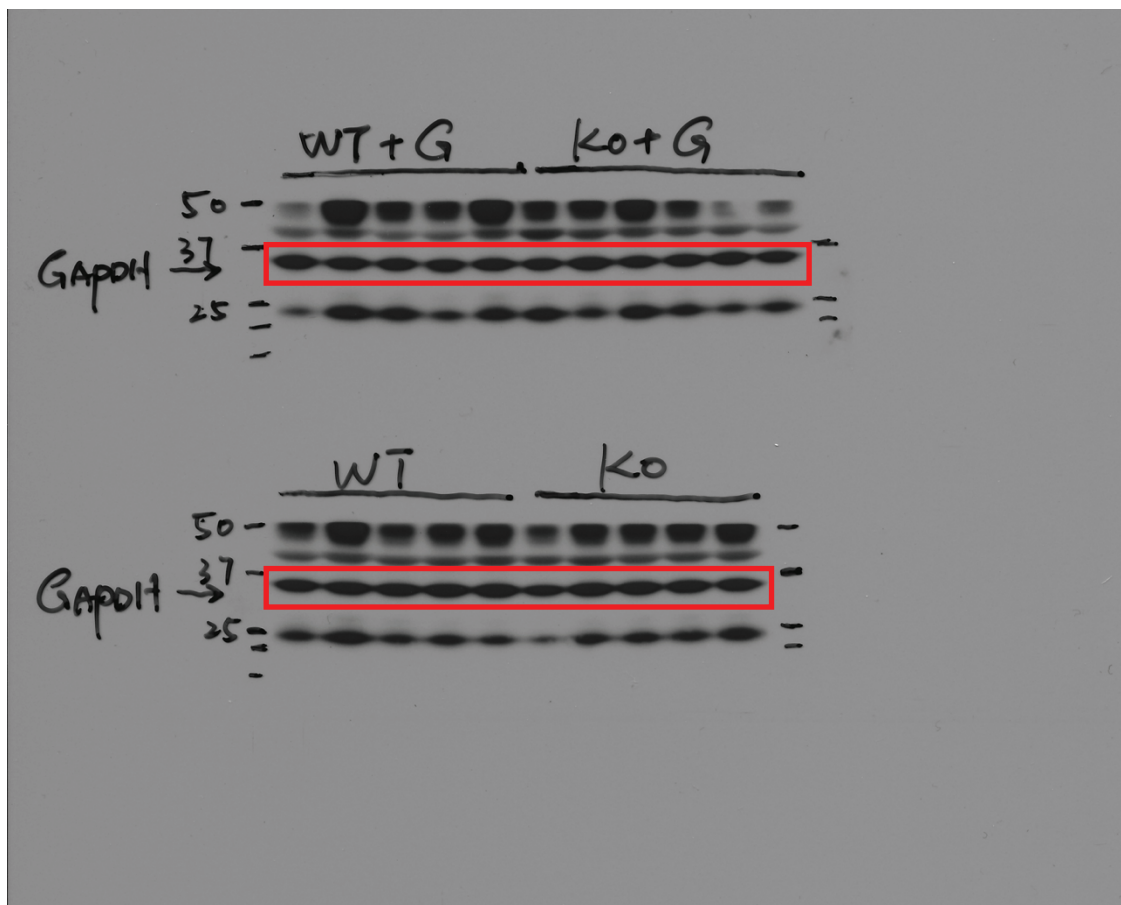



Extended Data Figure 3e

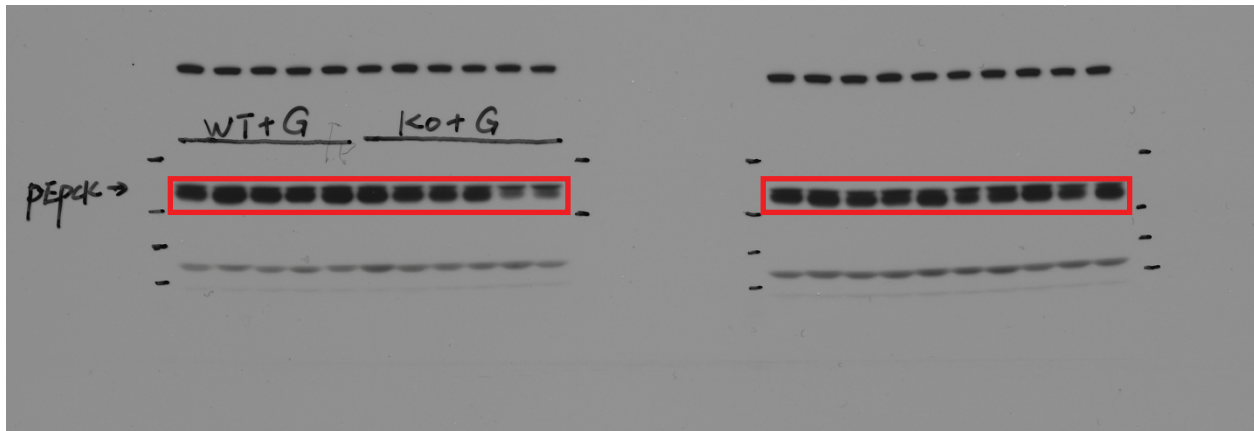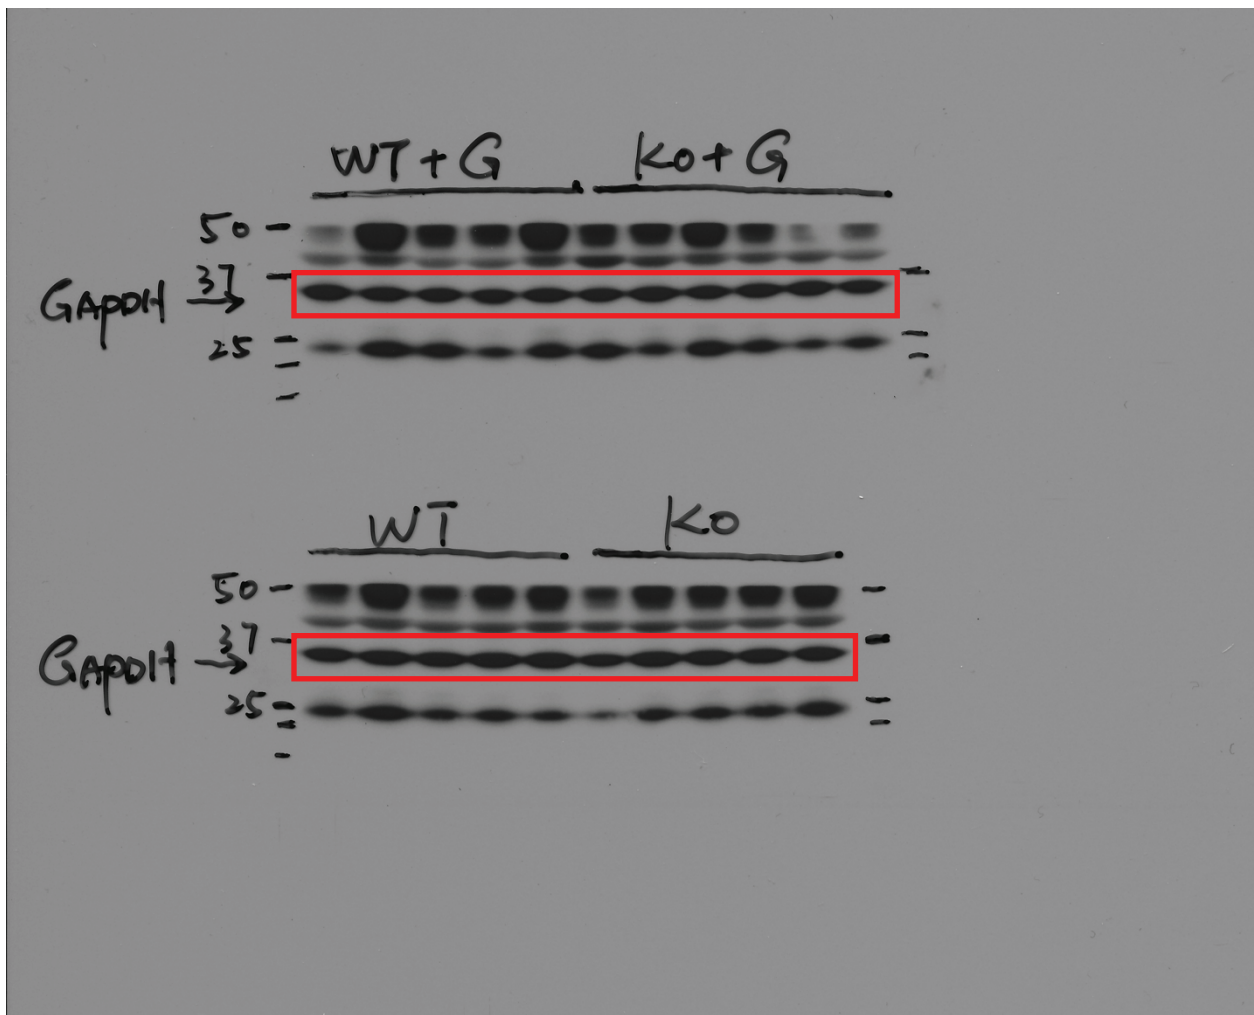

Extended Data Figure 3f

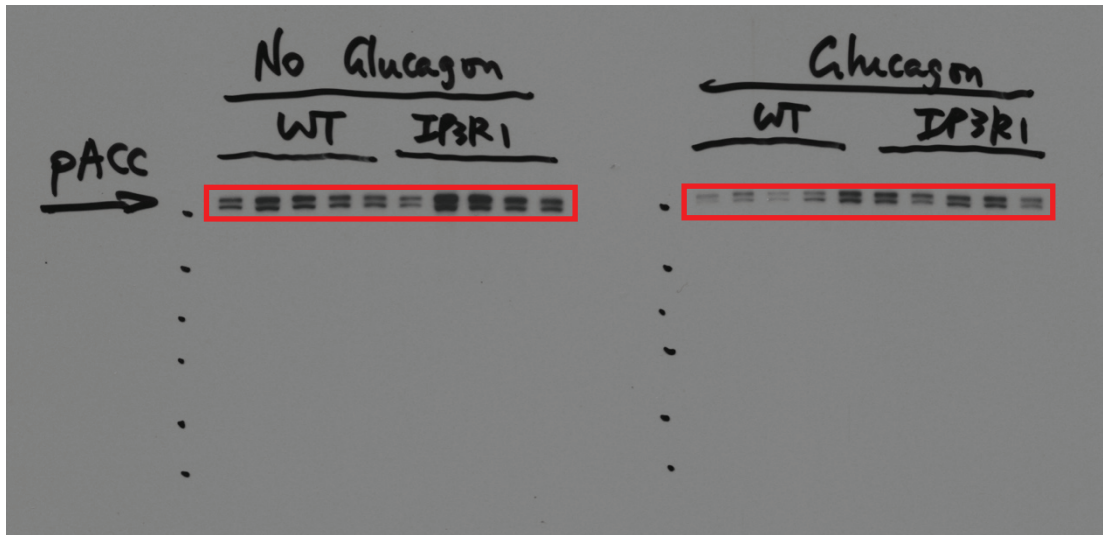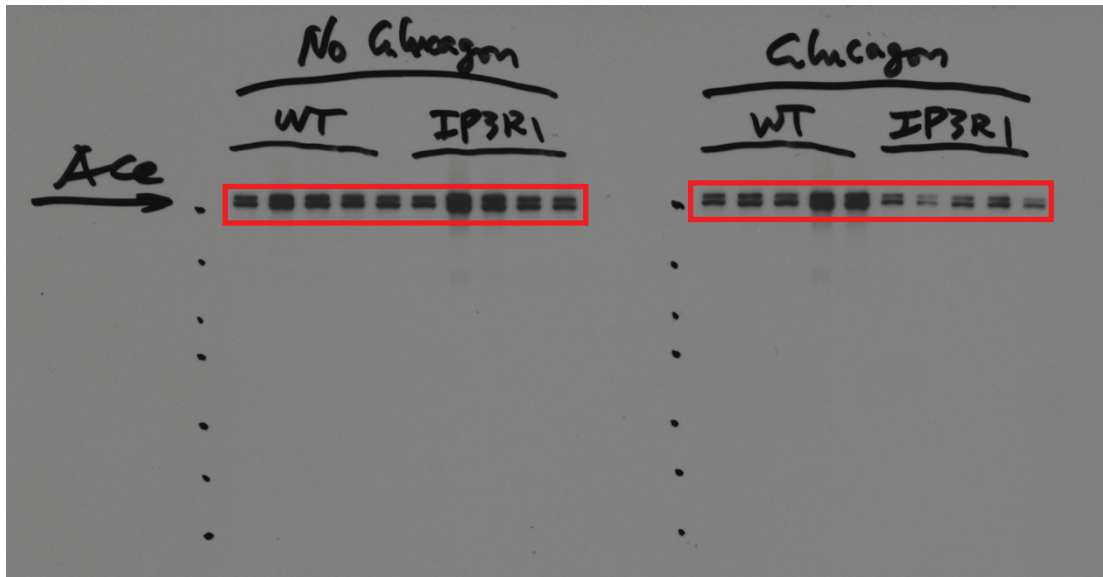

Extended Data Figure 3g

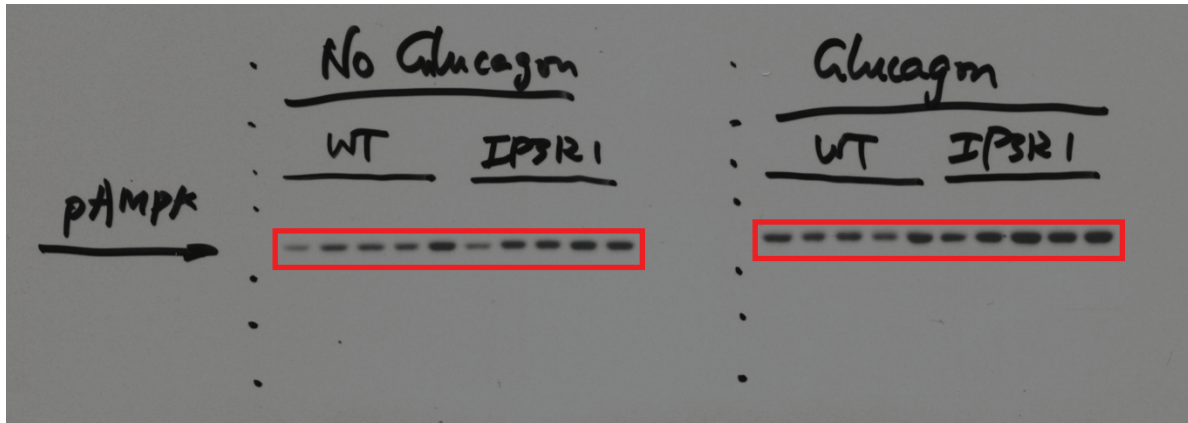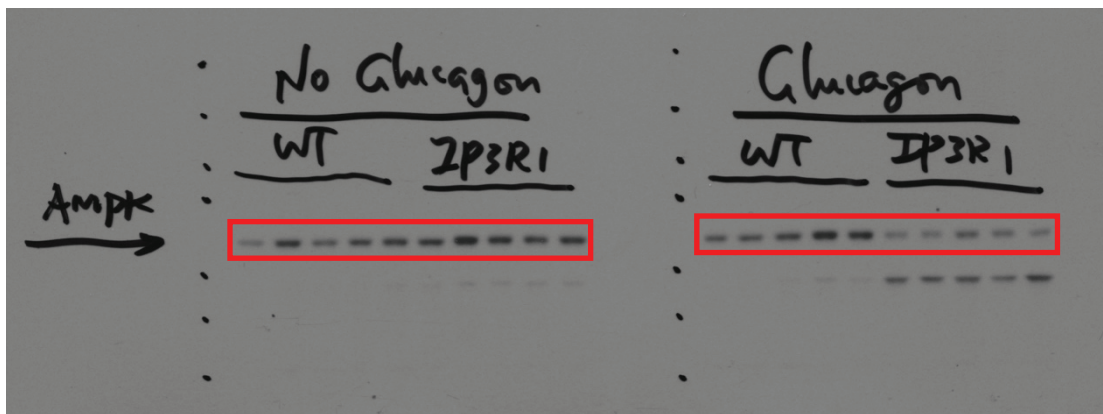



Figure 2a

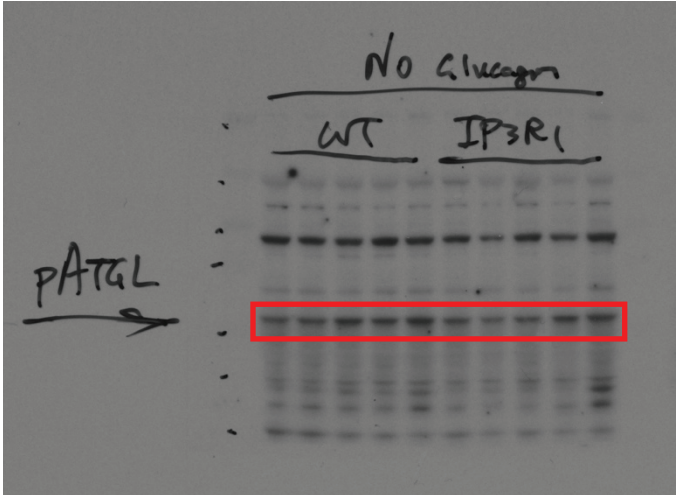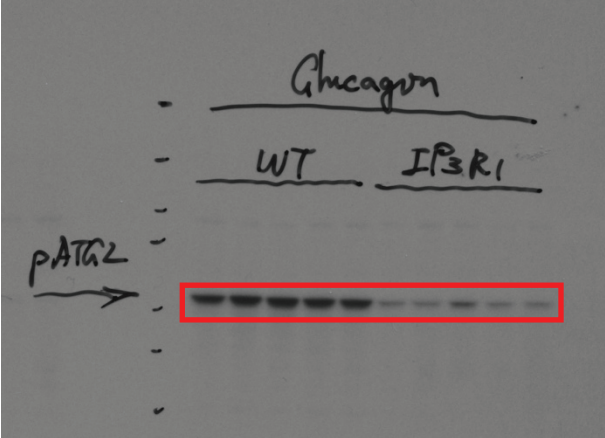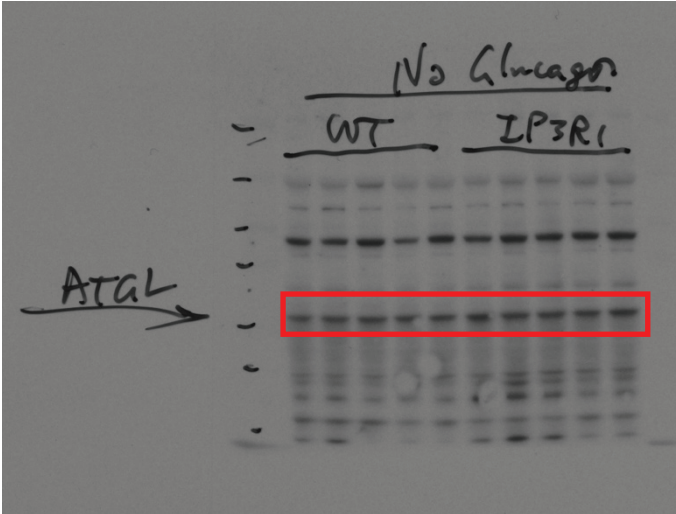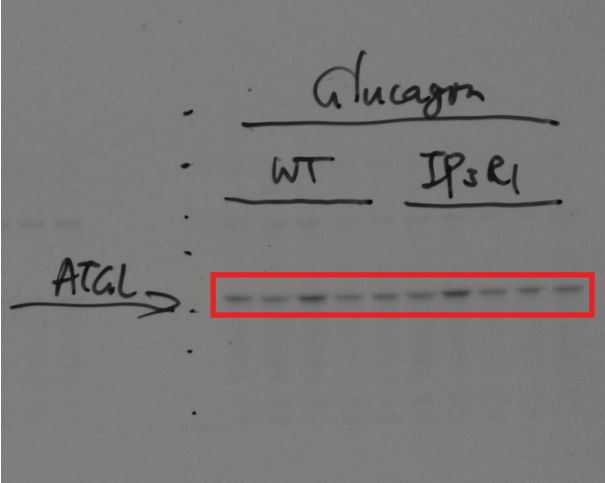

Extended Data Figure 3a

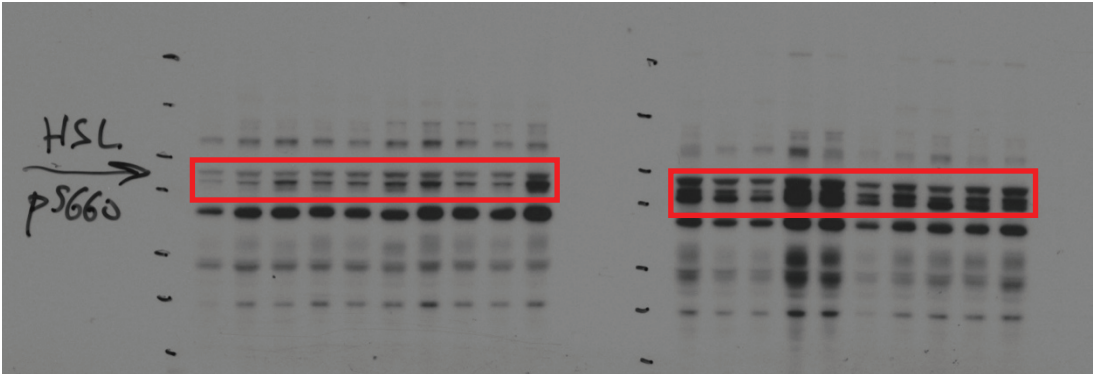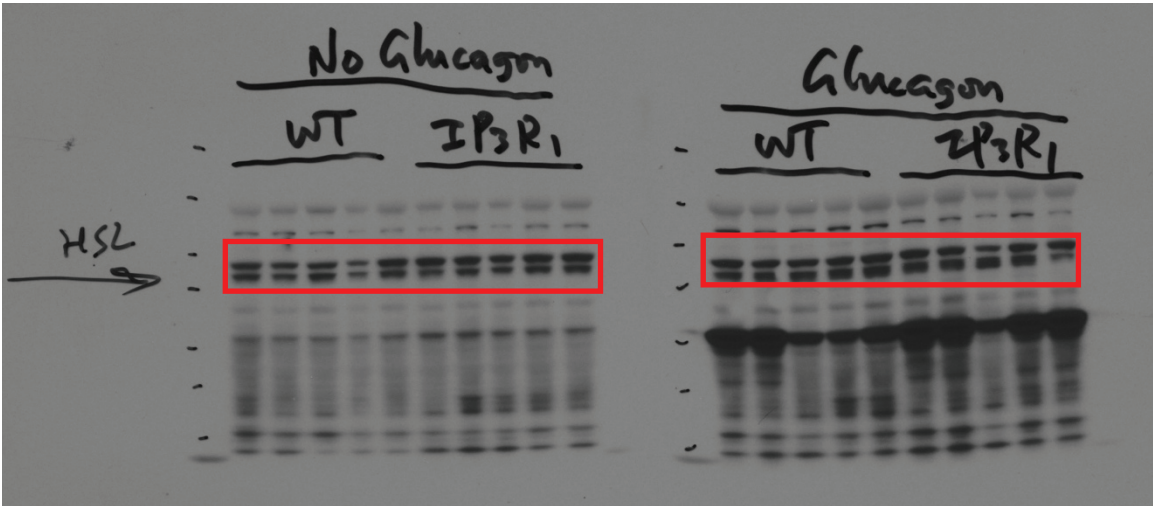

Extended Data Figure 9b-e

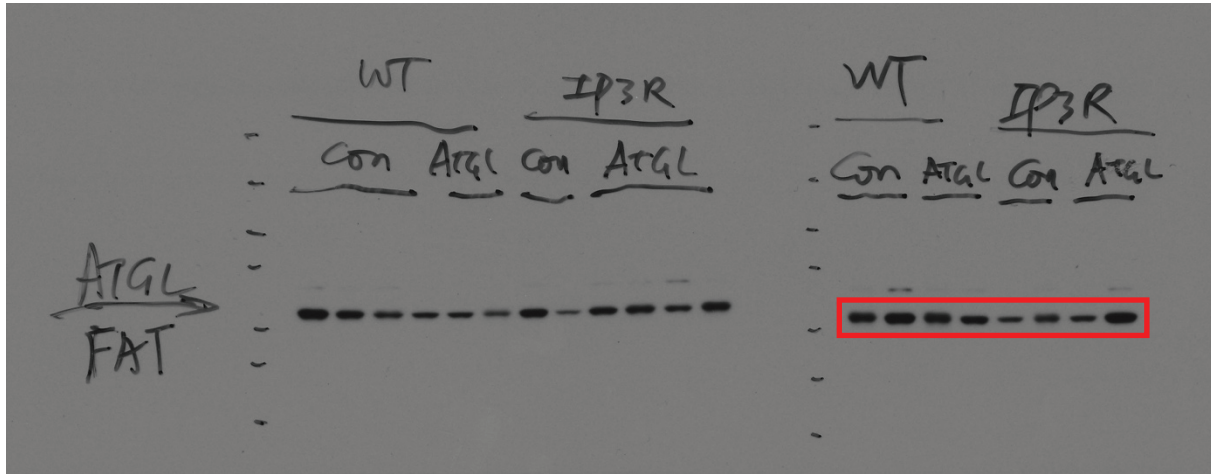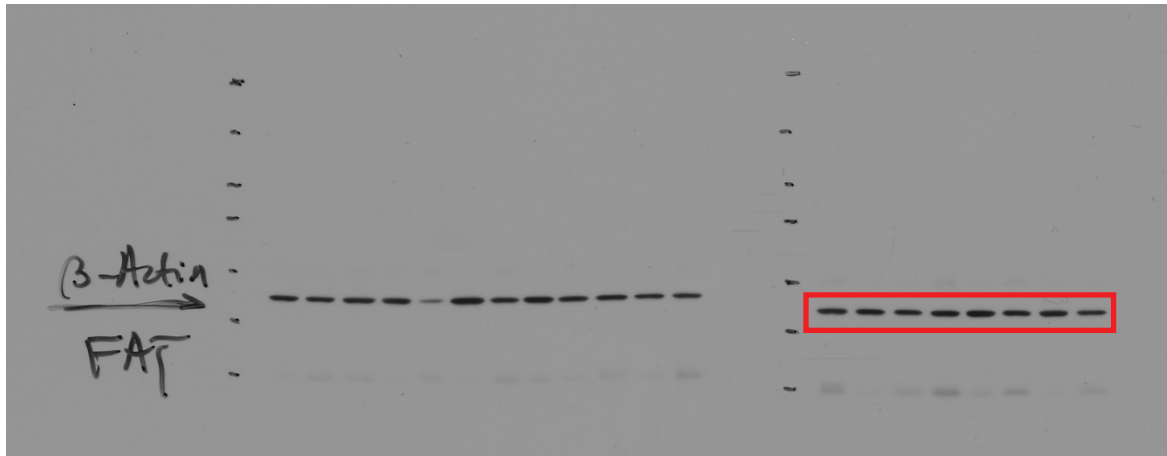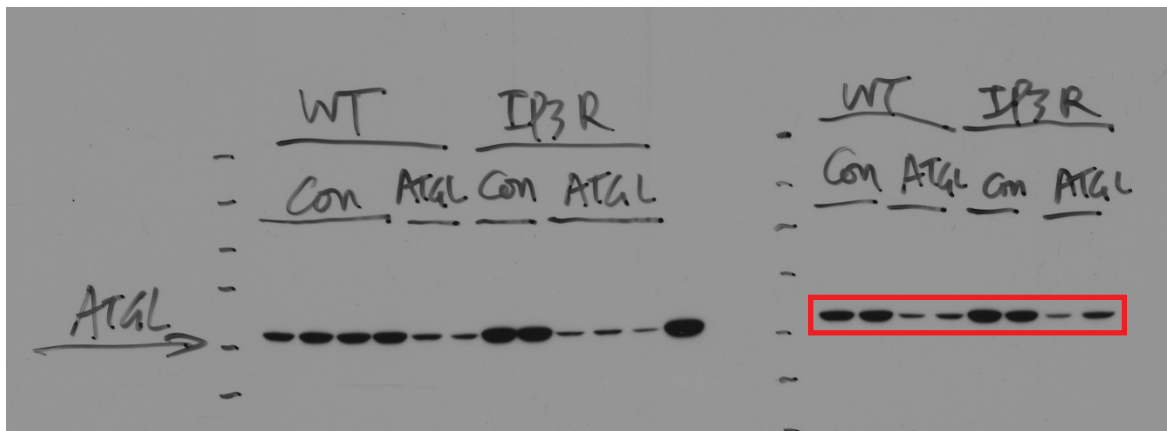



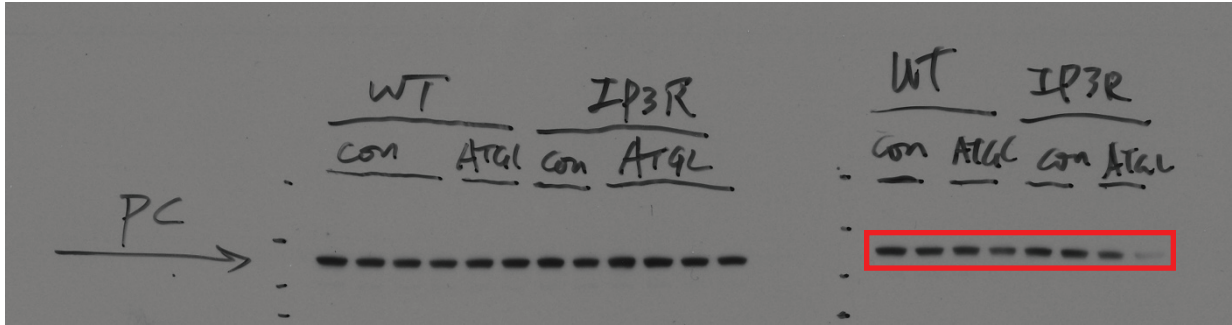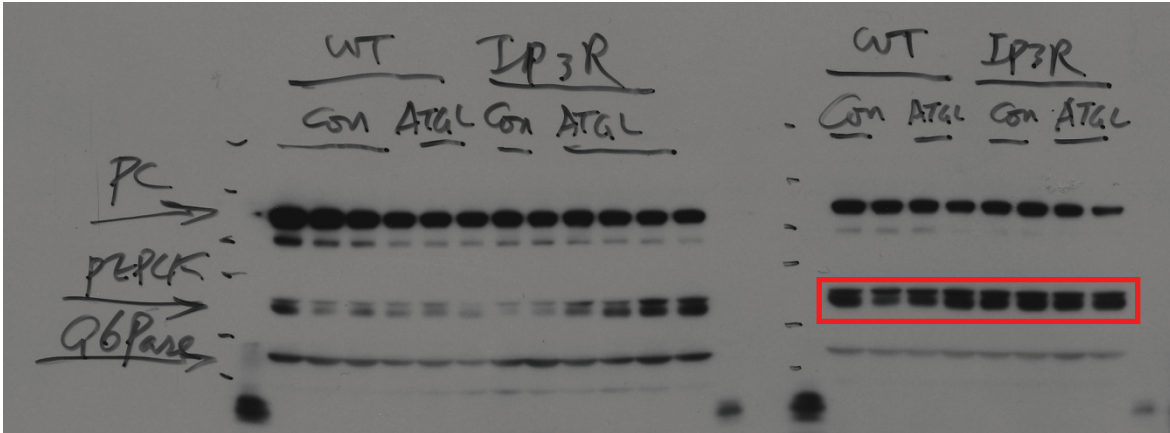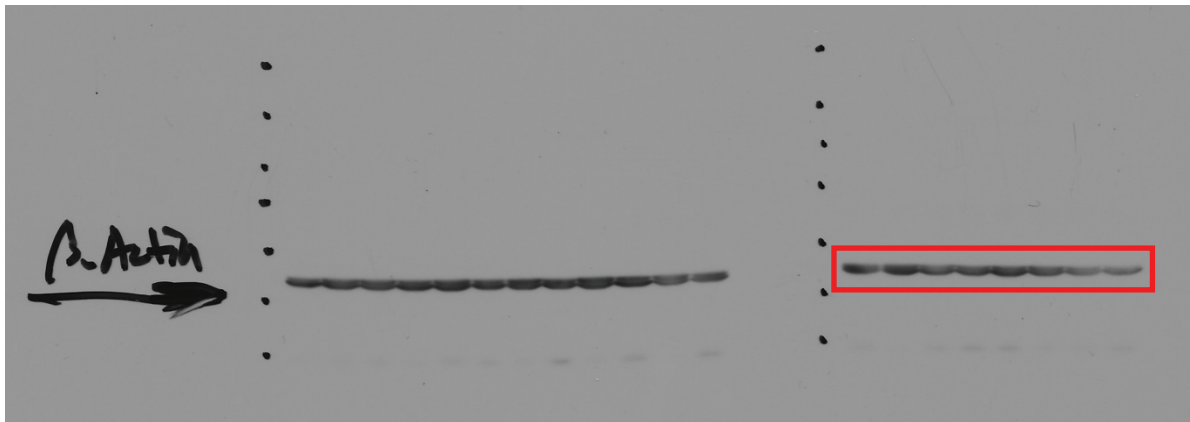

Extended Data Figure 7o

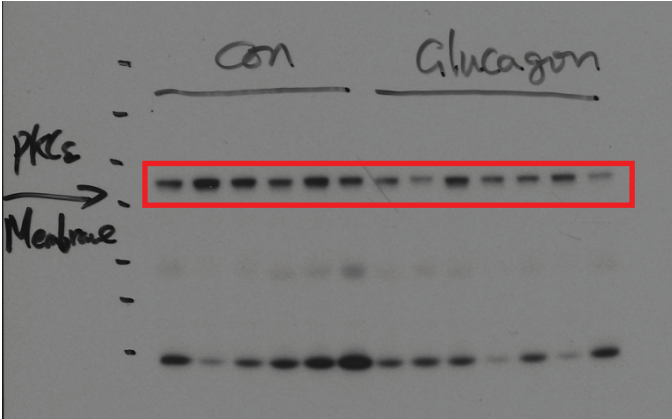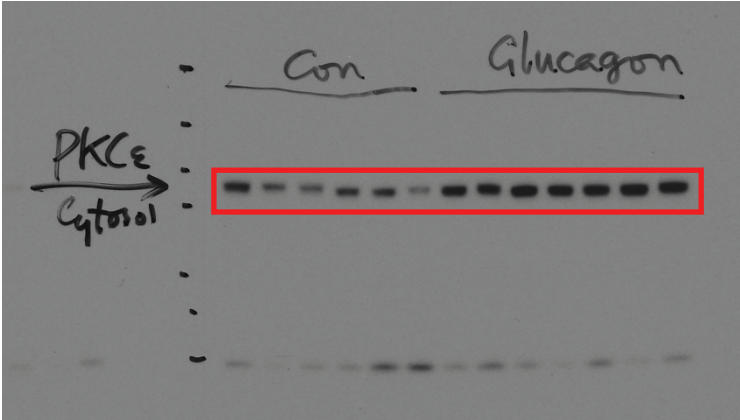

Figure 3f

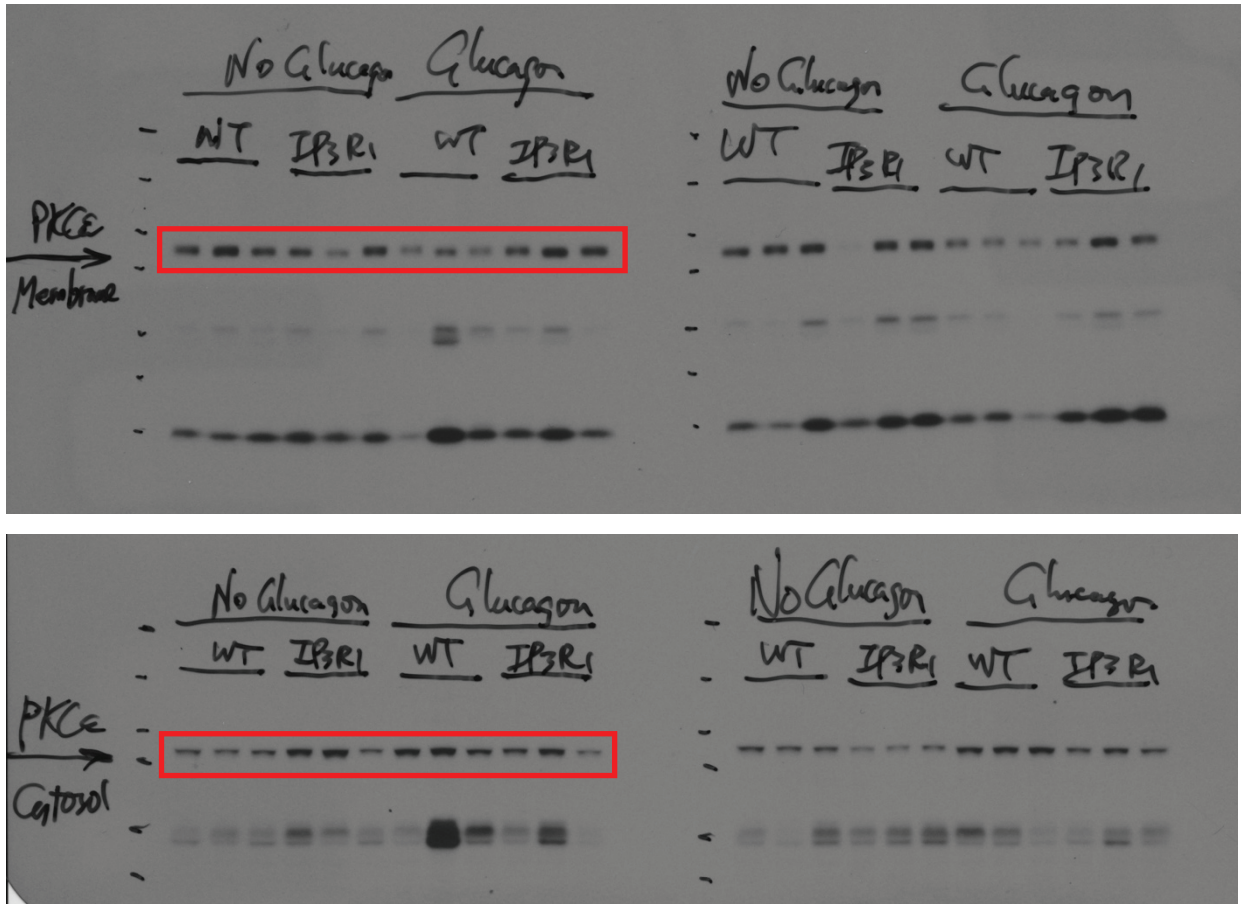

Supplement: NIHMS1549977-supplement-SuppInfo.pdf [file NIHMS1549977-supplement-SuppInfo.pdf]
